# Supplementary material for: Neuroimaging of neuropsychological disturbances following ischaemic stroke (CONNECT): a prospective cohort study protocol
Source: HighWire-hosted journal article supplement (doi:10.1136/bmjopen-2023-077799), 2024-01-01
Supplement: bmjopen-2023-077799supp001_data_supplement.pdf [file bmjopen-2023-077799supp001_data_supplement.pdf]

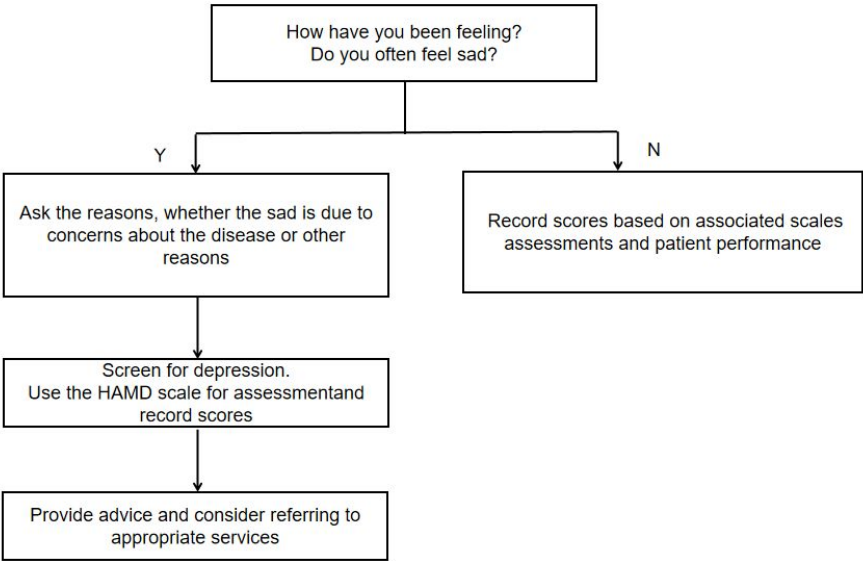

Figure S1 : Flow chart for telephone follow-up of post-stroke depression. Abbreviations: HAMD, Hamilton Depression Scale. Associate scales include Hamilton Anxiety Scale (HAMA), Insomnia Severity Index (ISI) and modified Rankin Rating Scale (mRS).

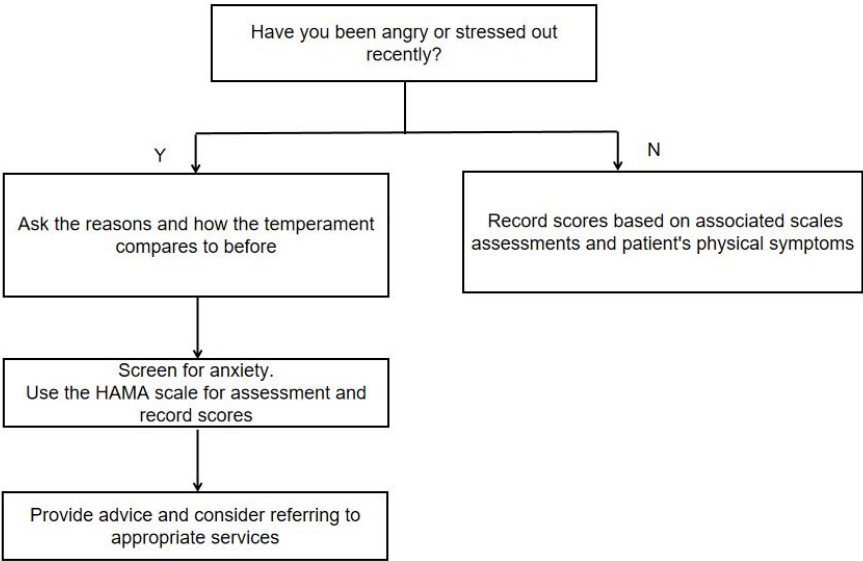

Figure S2 : Flow chart for telephone follow-up of post-stroke anxiety. Abbreviations: HAMA, Hamilton Anxiety Scale. Associate scales include Hamilton Depression Scale (HAMD), Insomnia Severity Index (ISI), modified Rankin Rating Scale (mRS) and telephone Interview for Cognitive Status (TICS).

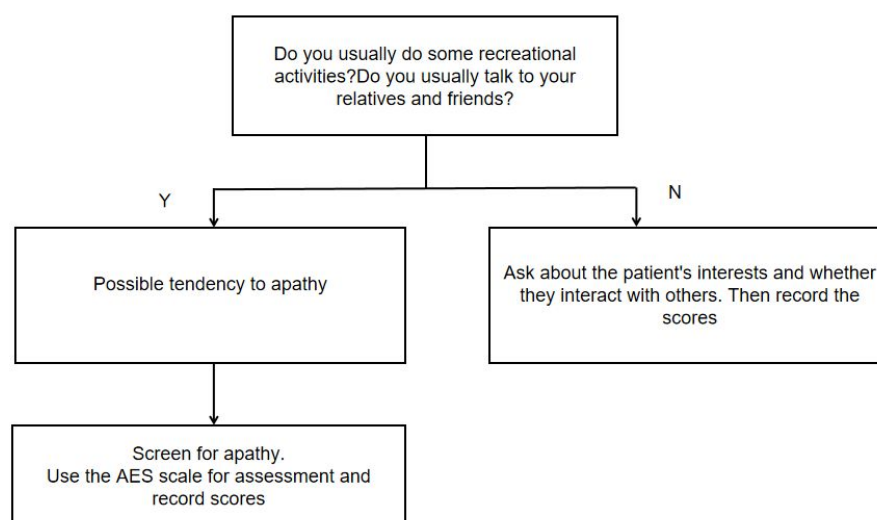

Figure S3: Flow chart for telephone follow-up of post-stroke apathy. Abbreviations: AES, Apathy Evaluation Scale.

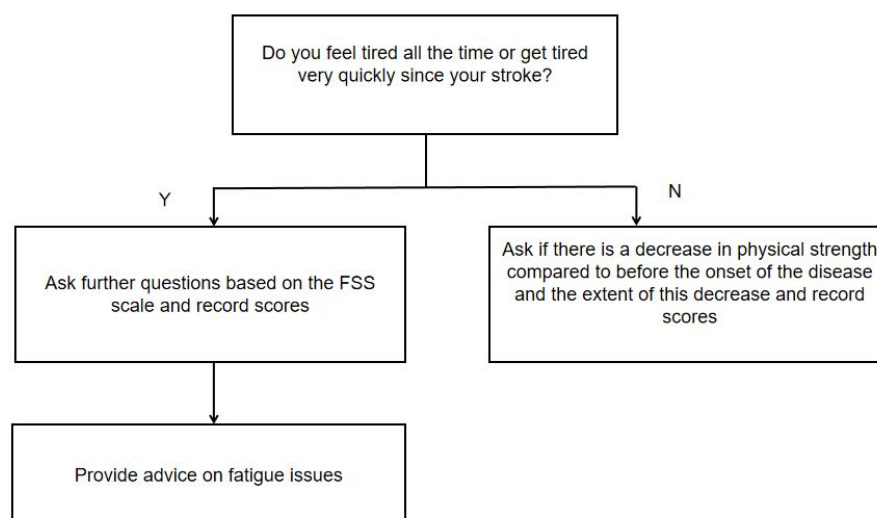

Figure S4: Flow chart for telephone follow-up of post-stroke fatigue. Abbreviations: FSS, Fatigue Severity Scale.

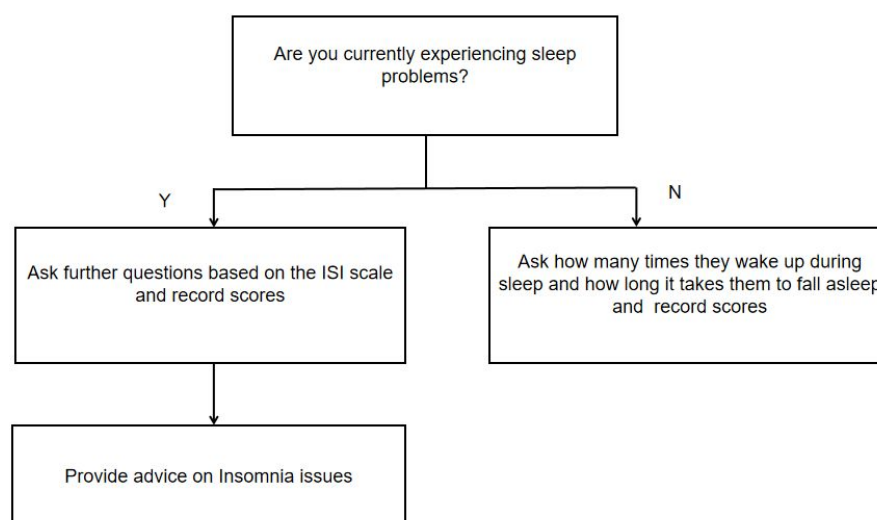

Figure S5: Flow chart for telephone follow-up of post-stroke insomnia. Abbreviations: ISI, Insomnia Severity Index.

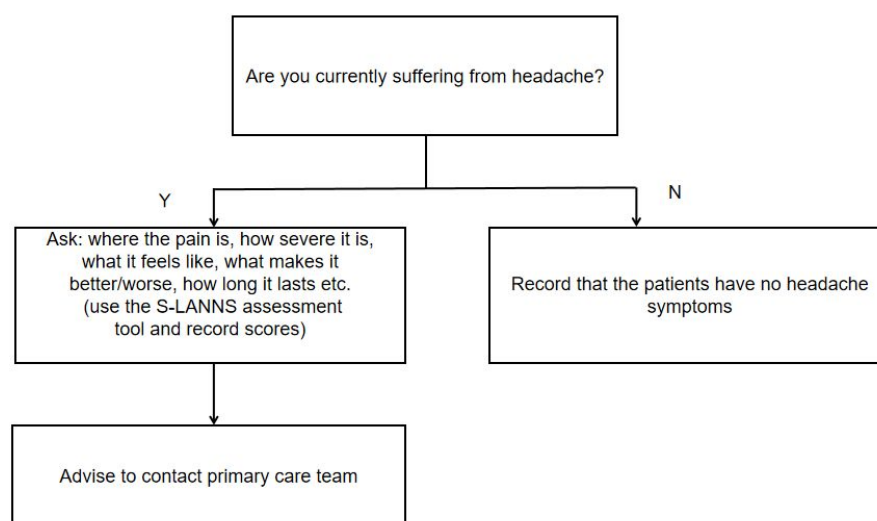

Figure S6: Flow chart for telephone follow-up of post-stroke headache. Abbreviations: S-LANSS, S-Leeds Assessment of Neuropathic Symptoms and Signs

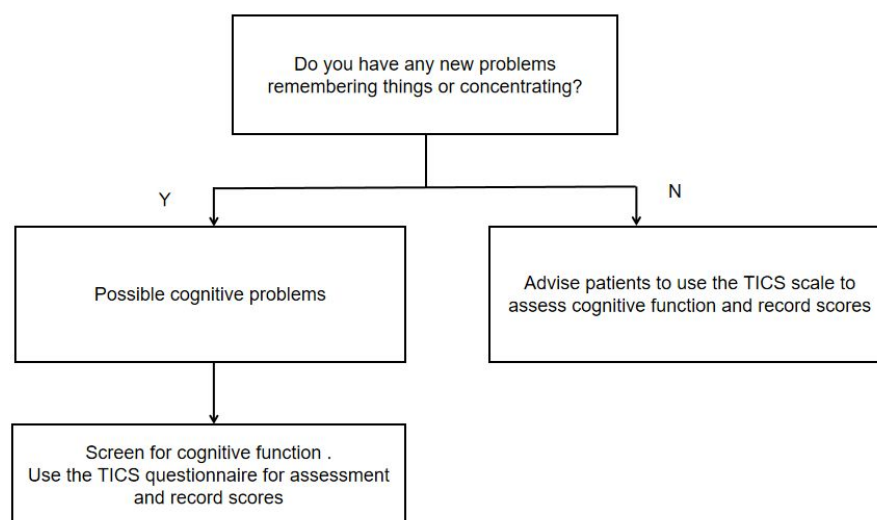

Figure S7: Flow chart for telephone follow-up of post-stroke cognitive impairment.  
Abbreviations: TICS, telephone Interview for Cognitive Status.
